# Supplementary material for: Single-cell RNAseq analysis of testicular germ and somatic cell development during the perinatal period
Source: Oxford University Press journal article supplement (doi:10.1242/dev.183251), 2020-01-21
Supplement: dev183251supp.pdf [file dev183251supp.pdf]

# Figure S1

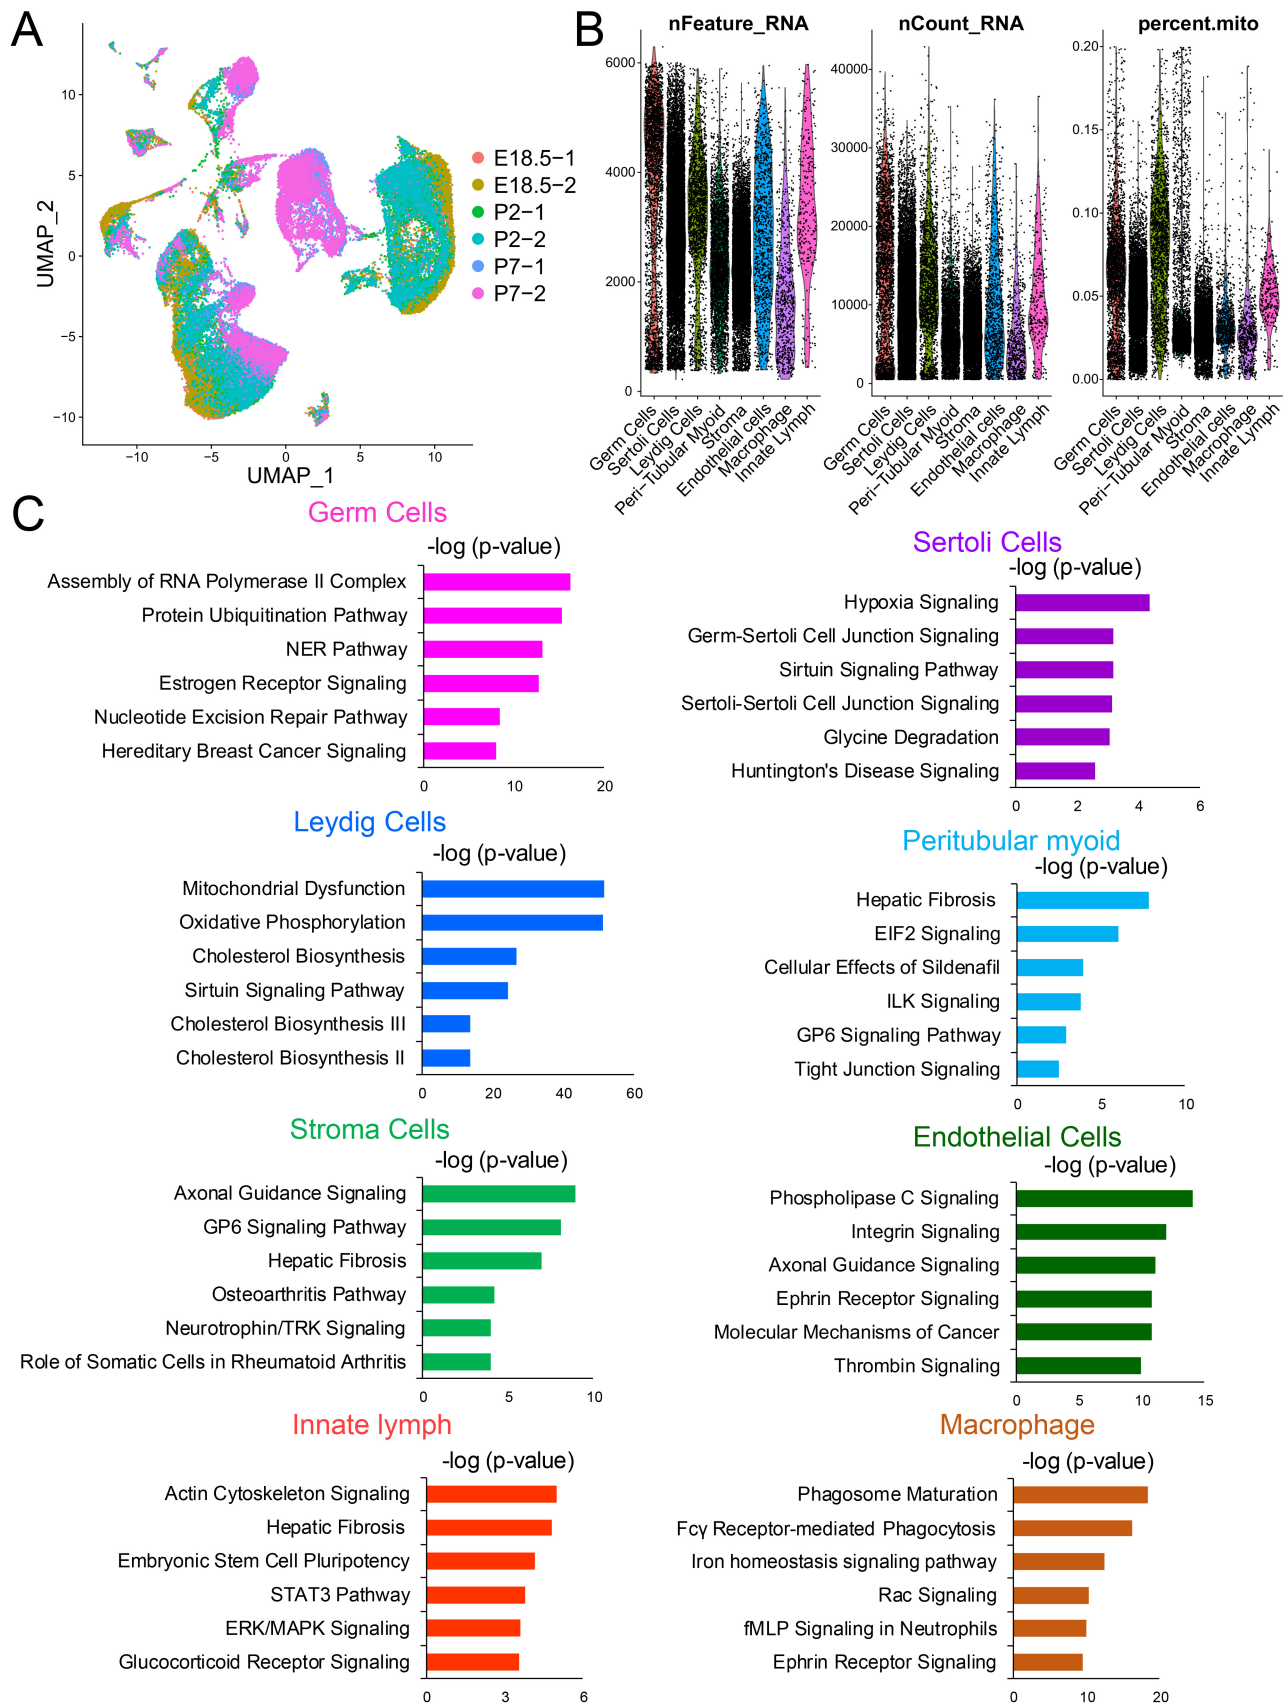

**Figure S1.** Identification and characterization of the major cell types from perinatal testes.

(A) UMAP plot of cells from E18.5, P2, and P7 mouse testes.

(B) Violin plots of cell types from E18.5, P2, and P7 mouse testes, showing nFeature\_RNA, nCount\_RNA, and mitochondrial gene expression profiles—post filtering—using the parameters indicated in the Materials and Methods.

(C) The most statistically significant ingenuity canonical pathways for each cell type.

# Figure S2

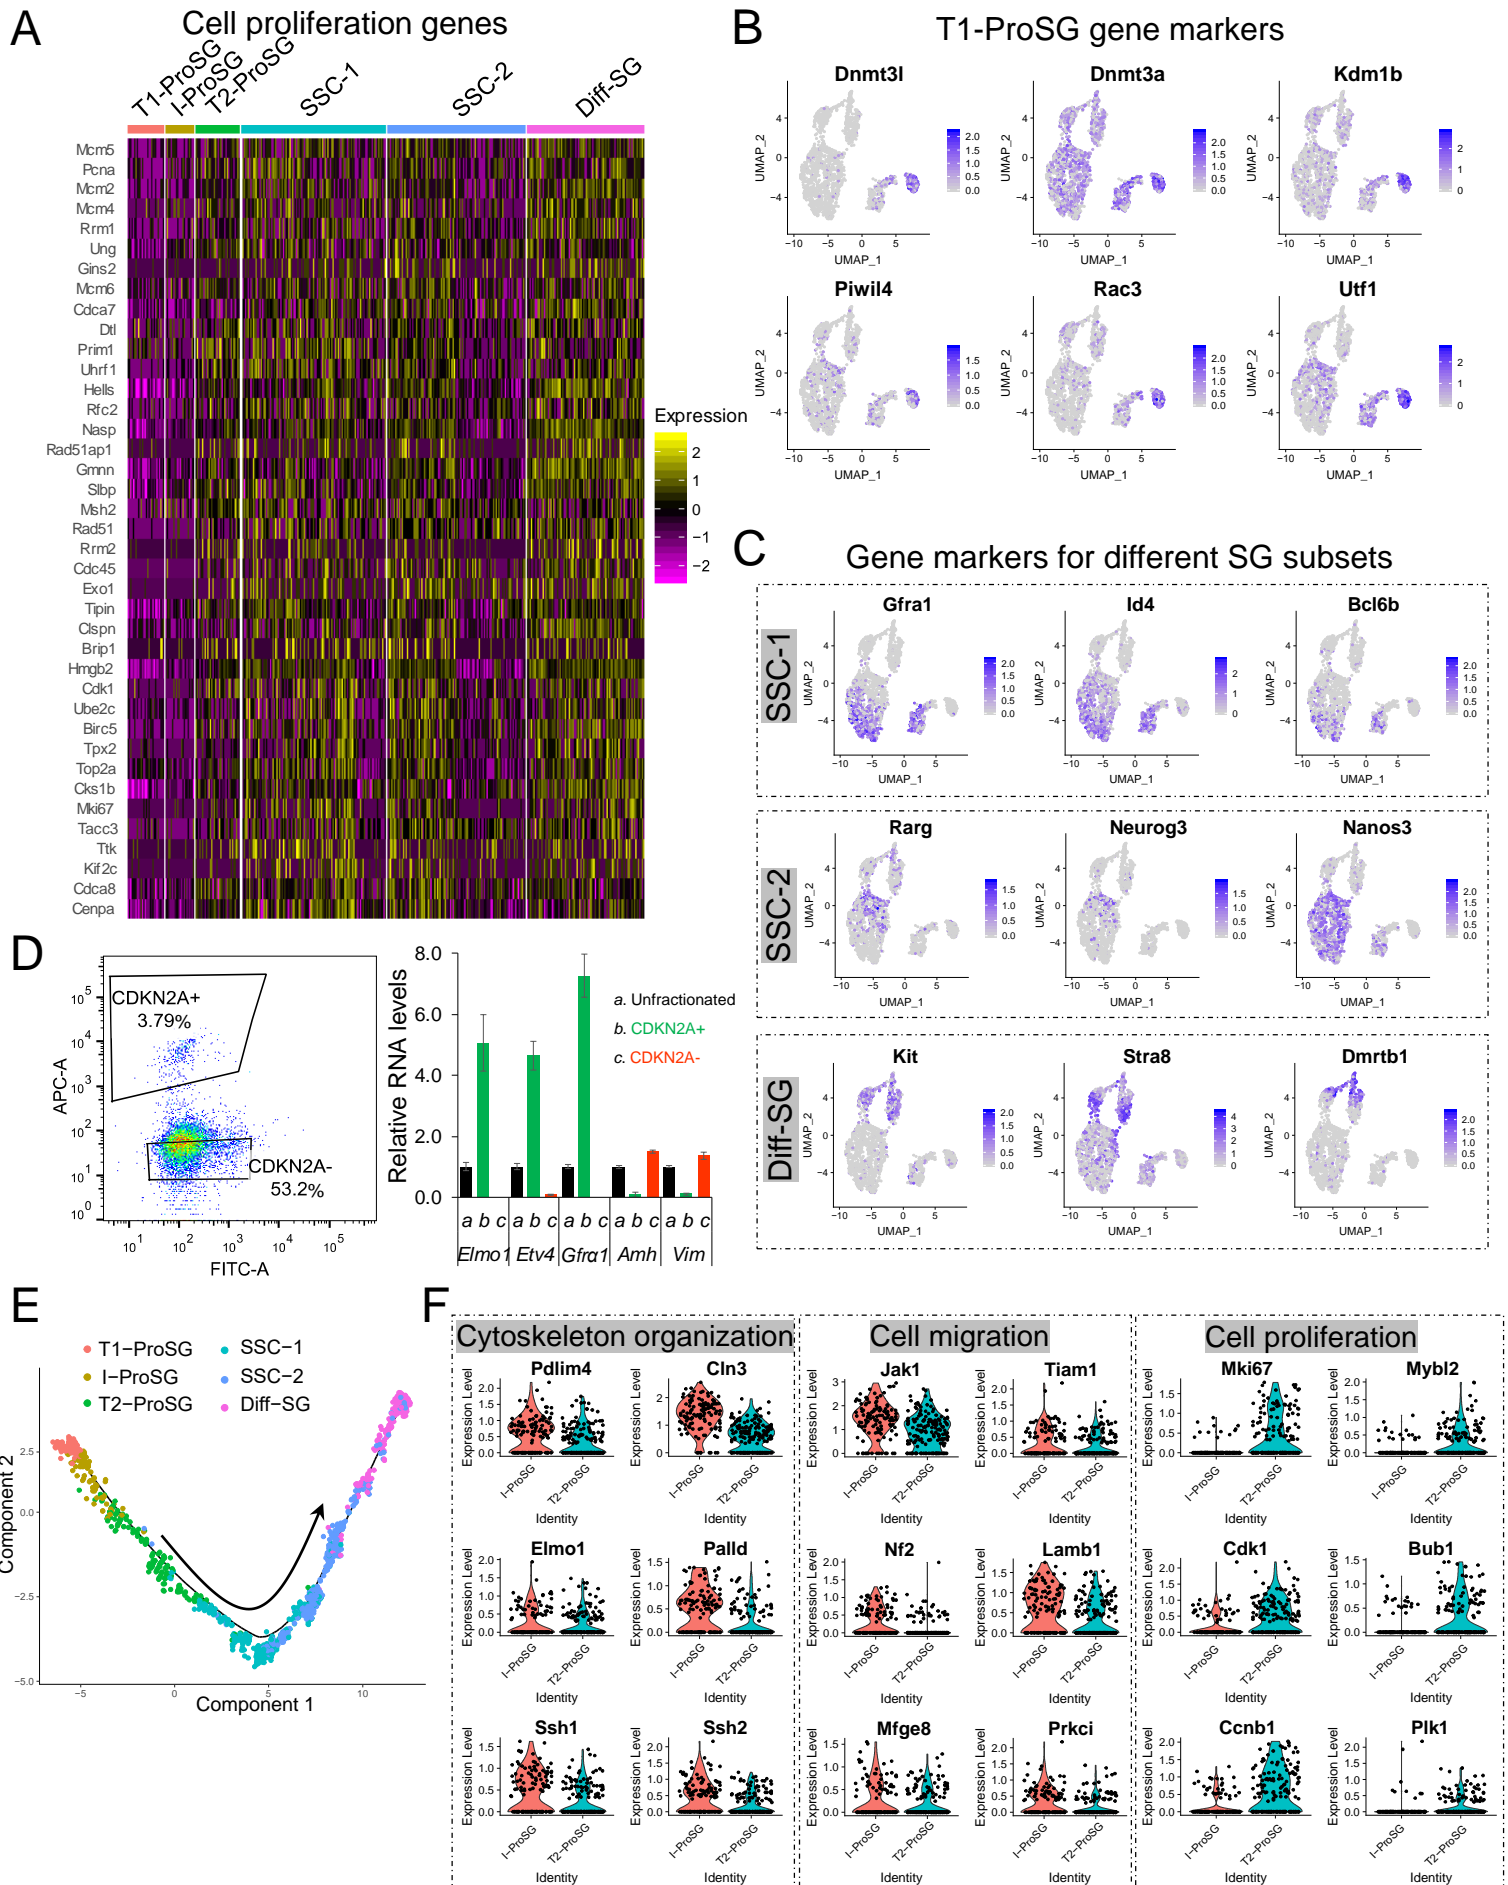

**Figure S2** The expression of gene markers for perinatal germ cell subsets.

(A) Heatmap of cell proliferation-related genes.

(B) UMAP plots (from Figure 2A) of gene markers specifically expressed in the T1-ProSG.

(C) UMAP plots (annotated from Figure 2A) of genes differentially expressed in different germ cell subsets.

(D) FACS plot of mouse P2 testicular cells stained with CDKN2A antibody. The percentage of positive and negative cells are indicated in upper and lower regions; CDKN2A-positive cells were gated by cells stained with secondary antibody only (< 0.01% positive). qPCR analysis was performed on sorted positive and negative cells, as well as unfractionated P2 testicular cells. The values shown are from FACS-purified cells relative to unfractionated cells (mean  $\pm$  SD from two biological replicates).

(E) Monocle trajectory analysis of germ cell subsets from E18.5, P2, and P7 mouse testes.

(F) Violin plots showing expression of genes associated with actin cytoskeleton organization, cell migration, and cell proliferation in both I- and T2-ProSG.

## Fig. S3

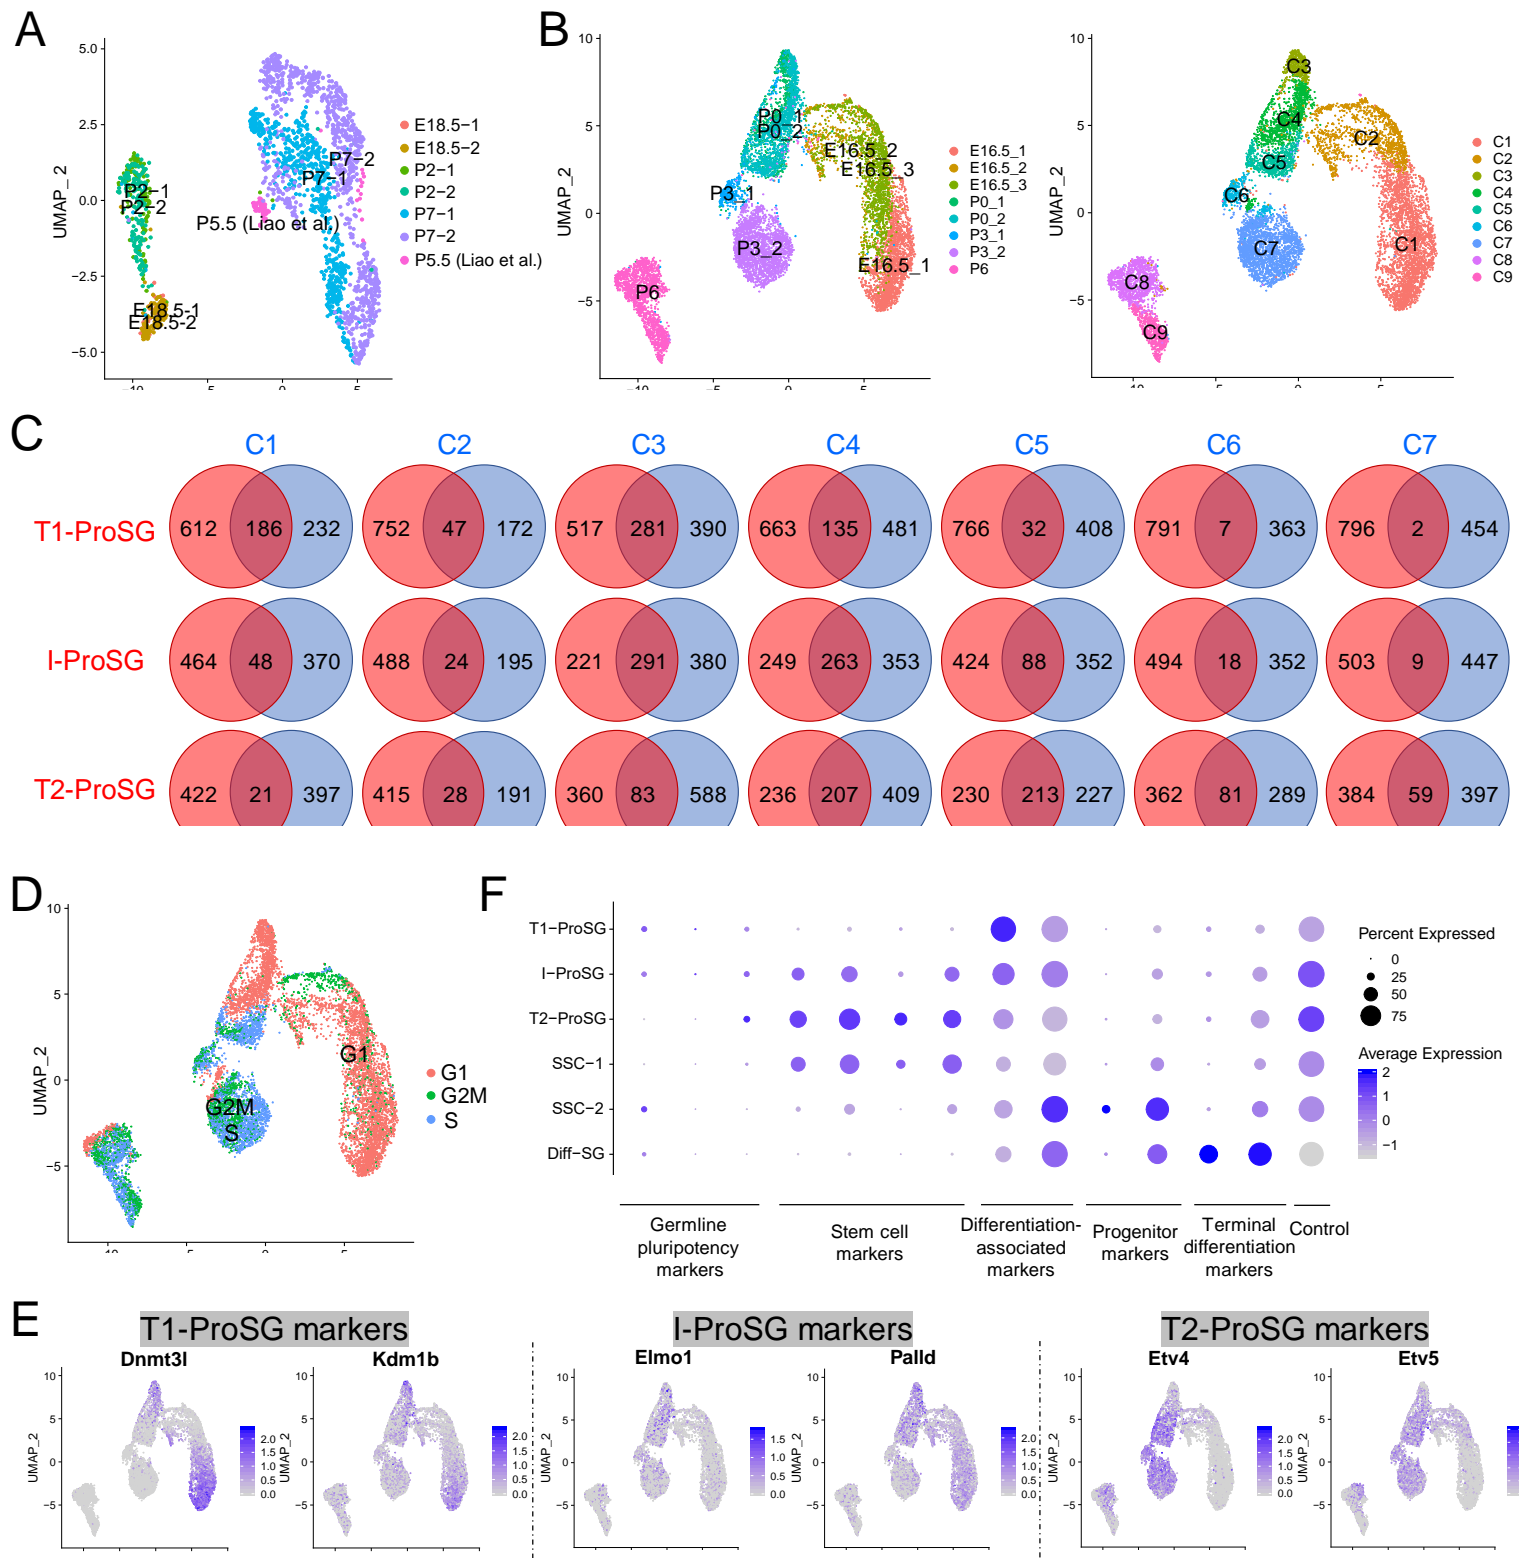

**Figure S3.** Comparison of our findings of ProSG-to-SSC development with published datasets.

(A) UMAP plot of germ cells from E18.5, P2, P7 mouse testes (from our study) and P5.5 testes from Liao et al.

(B) UMAP plot of germ cells from Law et al. Left, sample information; Right, cell clusters.

(C) Venn diagrams of DEGs from indicated ProSG subsets (from our study) and germ cell clusters (from Law et al.).

(D) UMAP plot inferring the cell-cycle phase based on expression of a large set of G2M- and S-phase genes (Kowalczyk et al., 2015).

(E) UMAP plots of ProSG markers we identified in our study using Law et al. dataset.

(F) Dot plots of markers that Law et al. used in their study using our dataset.

## Figure S4

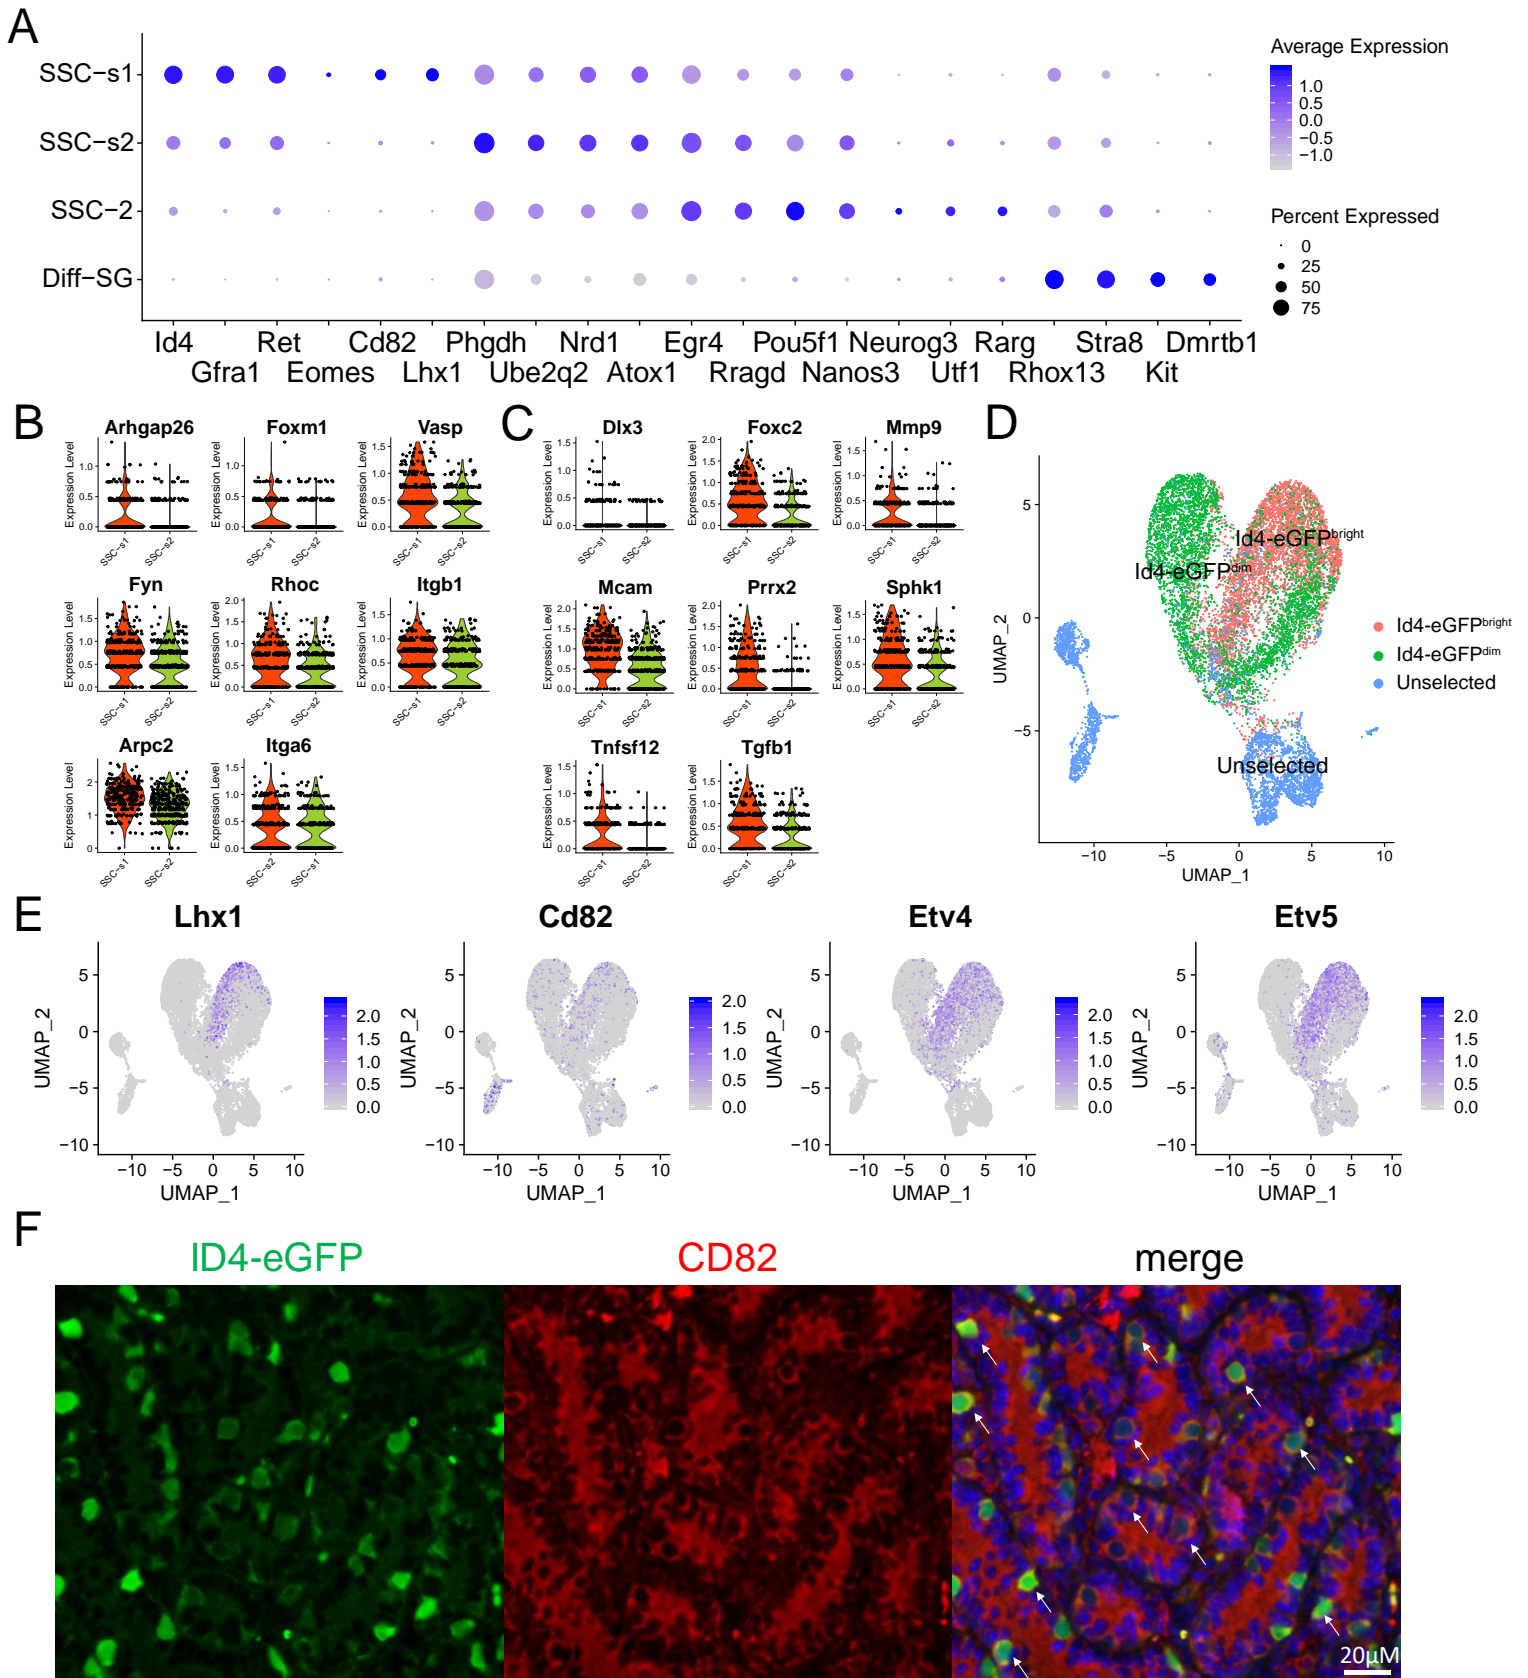

**Figure S4.** Undifferentiated SG states during the SSC establishment period.

(A) Dotplots of genes differentially expressed in different SG subsets/states.

(B) Violin plots of integrin signaling-related genes in different SSC-1 states.

(C) Violin plots of vessel development-related genes in different SSC-1 states.

(D) UMAP plot of germ cells purified by FACS against Id4-eGFP from Hermann BP et al. 2018.

(E) UMAP plots of SSC-s1 markers we identified in dataset shown in (D).

(F) IF analysis of P7 testes sections from Id4-eGFP mice stained with CD82 antibody. Scale bar, 20  $\mu$ m. White arrow showing the labeled Id4-eGFP<sup>+</sup> germ cells.

Figure S5

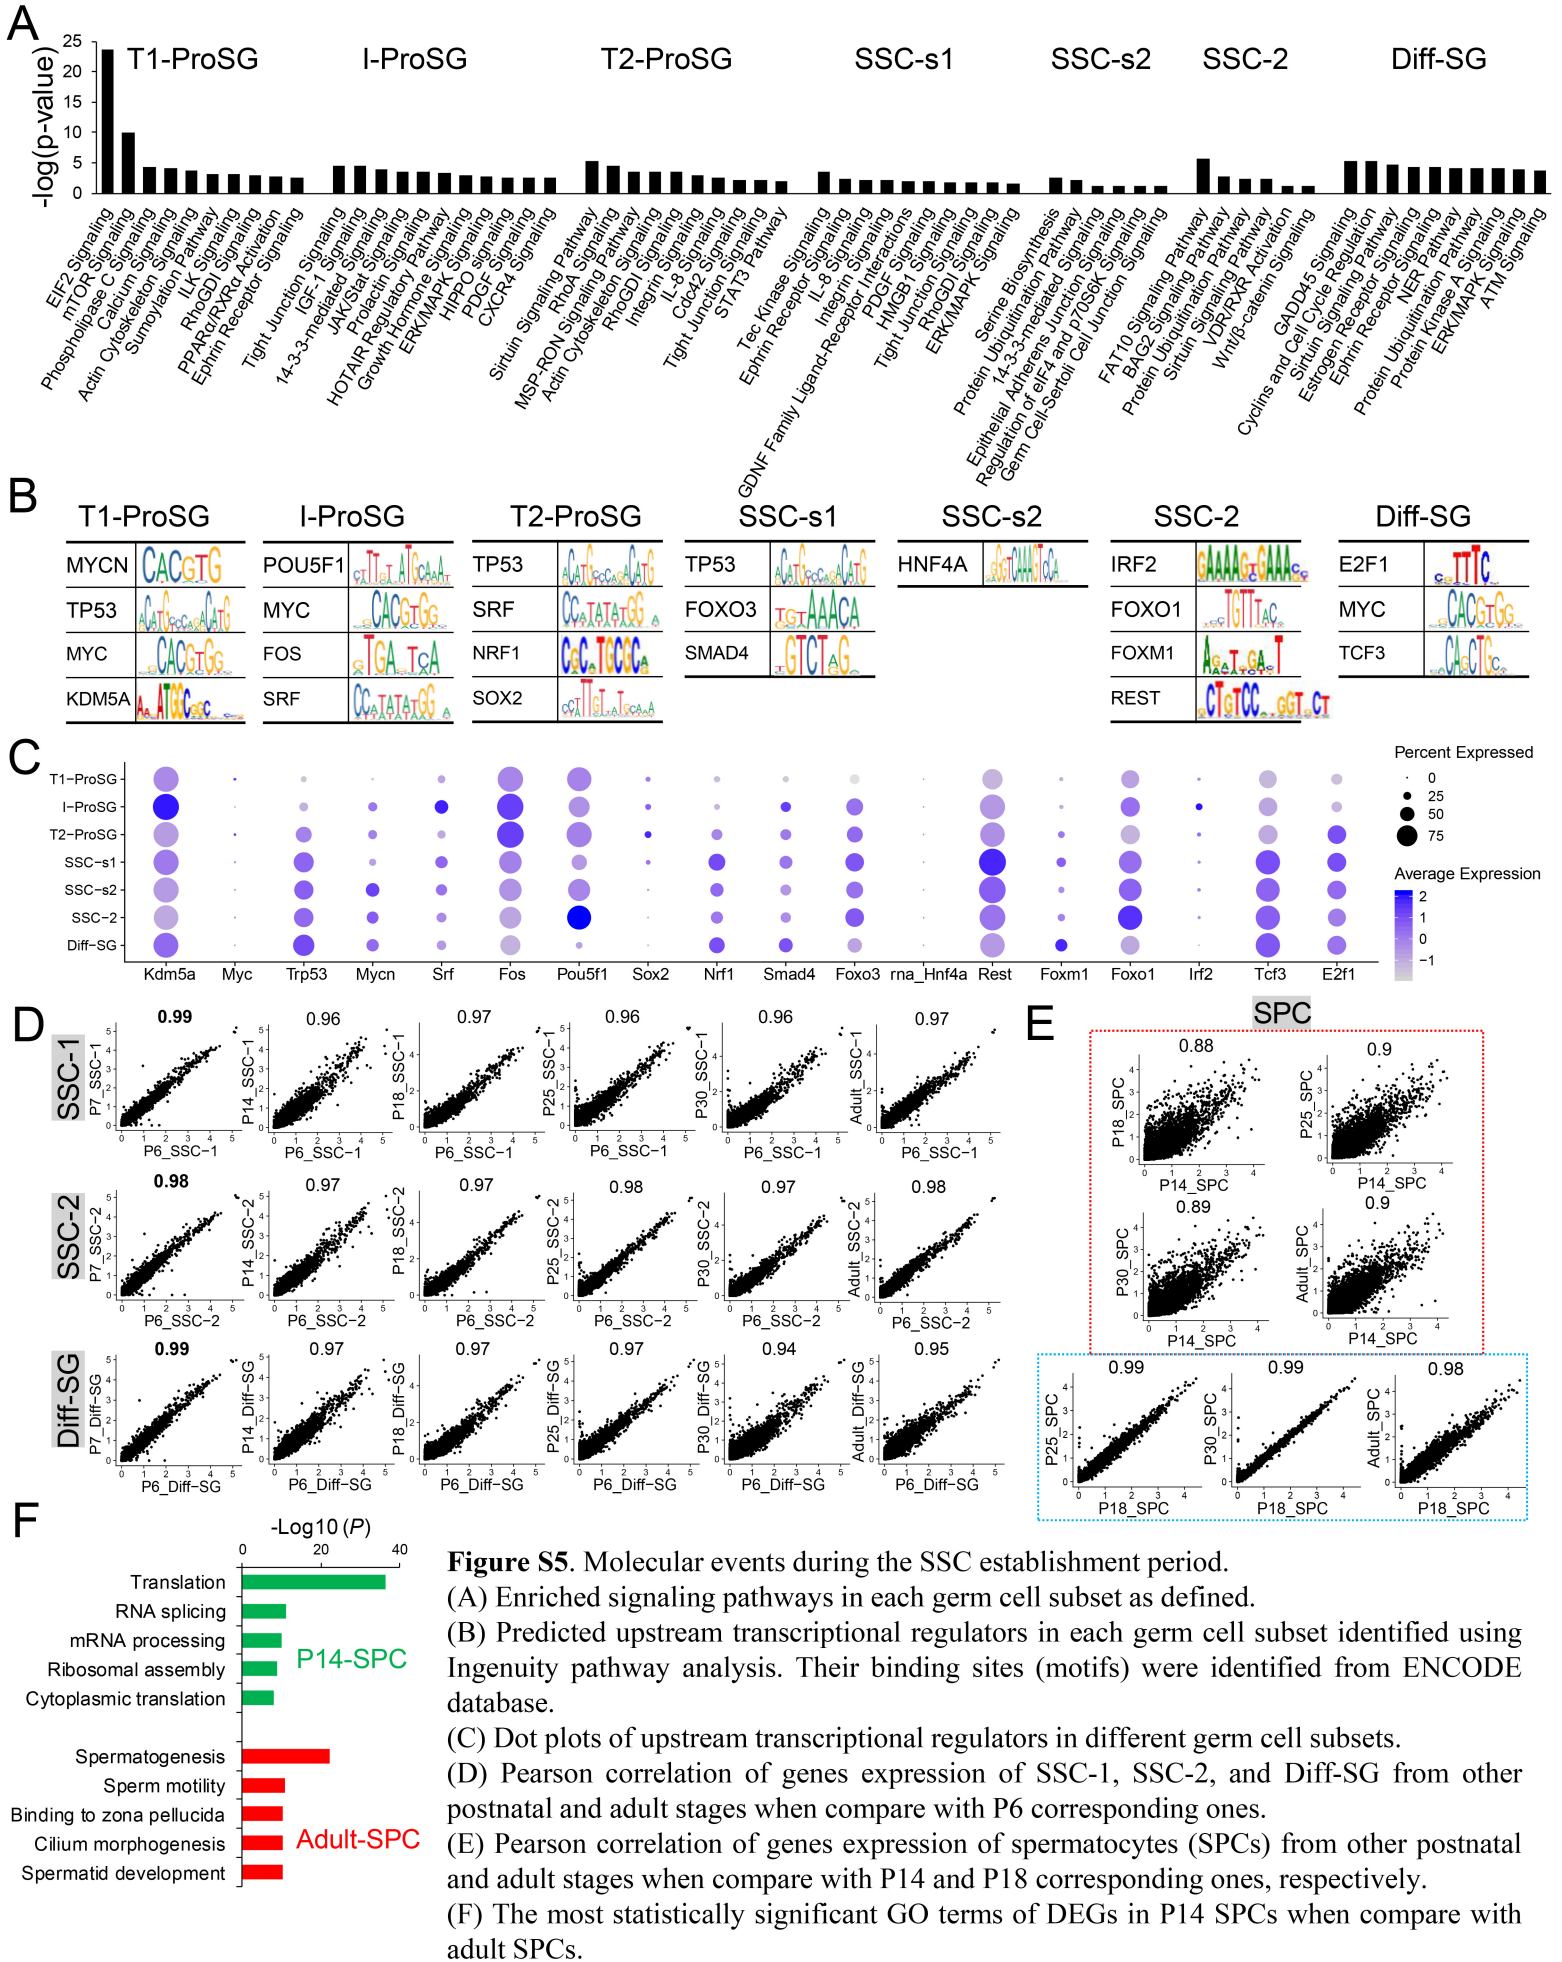

**Figure S5.** Molecular events during the SSC establishment period. (A) Enriched signaling pathways in each germ cell subset as defined. (B) Predicted upstream transcriptional regulators in each germ cell subset identified using Ingenuity pathway analysis. Their binding sites (motifs) were identified from ENCODE database. (C) Dot plots of upstream transcriptional regulators in different germ cell subsets. (D) Pearson correlation of genes expression of SSC-1, SSC-2, and Diff-SG from other postnatal and adult stages when compare with P6 corresponding ones. (E) Pearson correlation of genes expression of spermatocytes (SPCs) from other postnatal and adult stages when compare with P14 and P18 corresponding ones, respectively. (F) The most statistically significant GO terms of DEGs in P14 SPCs when compare with adult SPCs.

## Figure S6

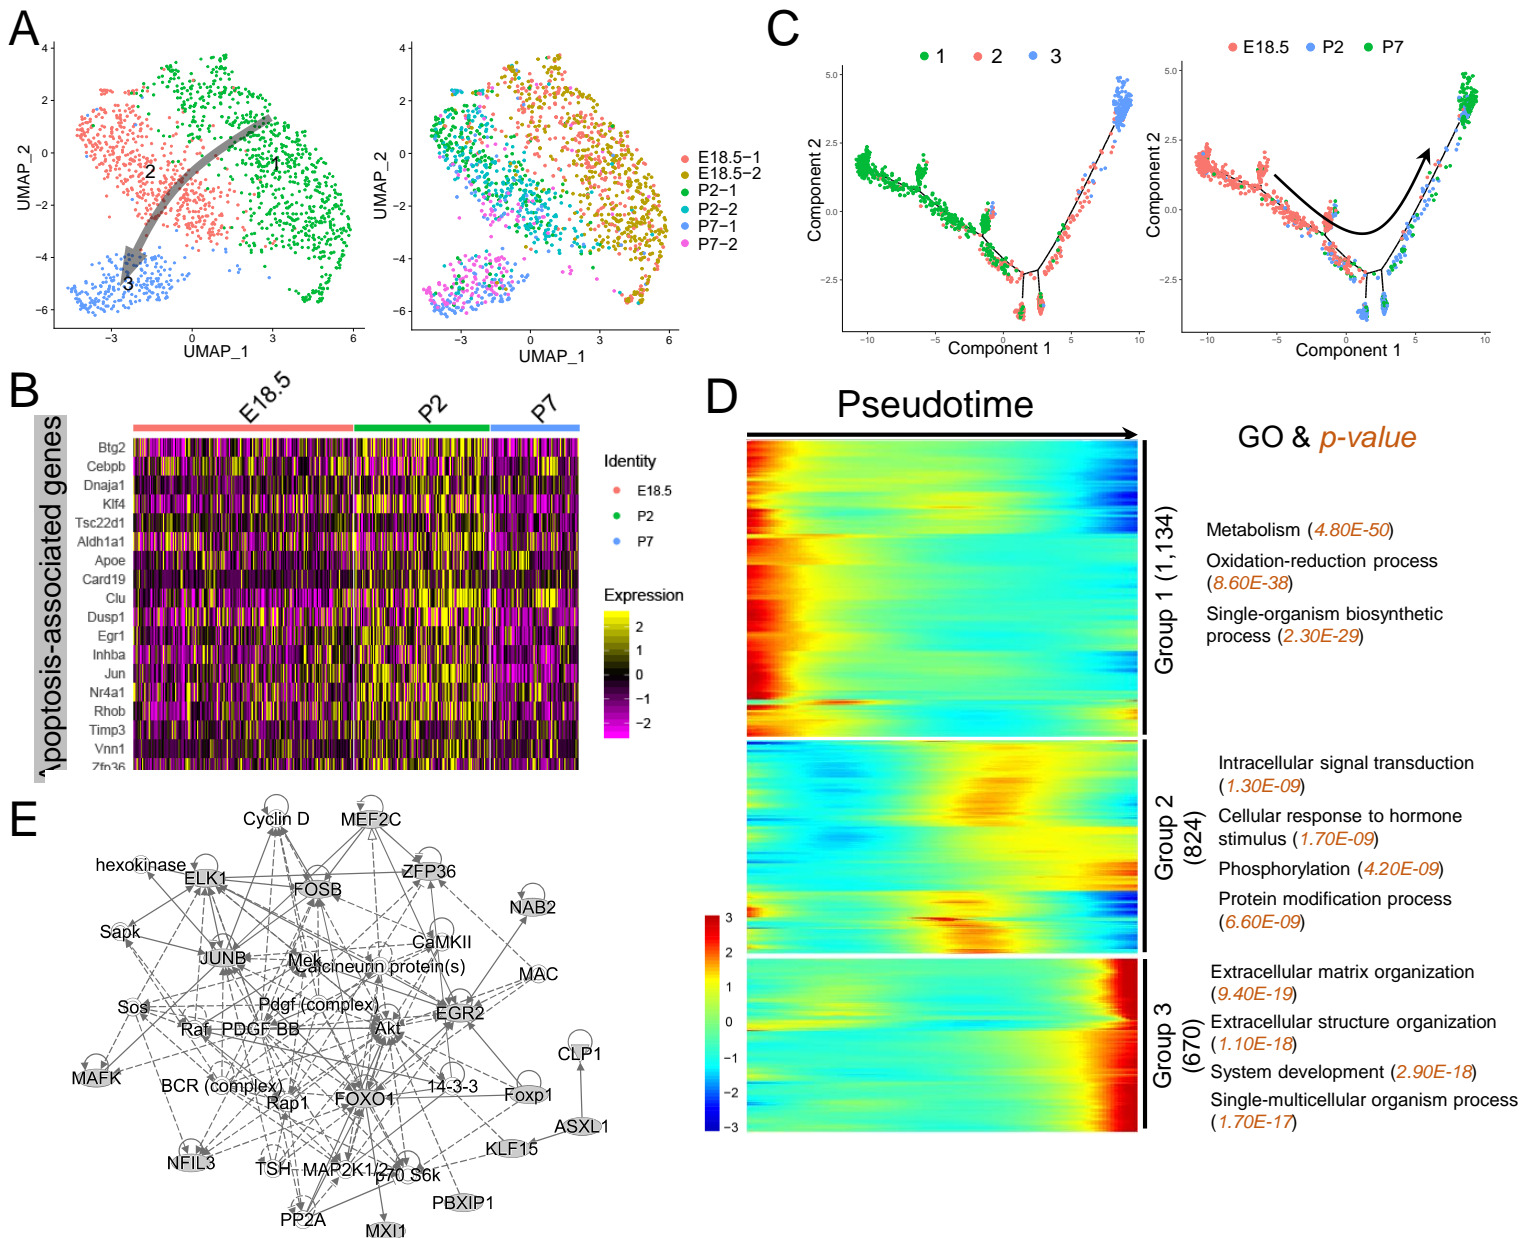

**Figure S6.** Identification and characterization of Leydig cells during the perinatal stage.

(A) UMAP plot of Leydig cells (annotated from Fig. 1A) from E18.5, P2, and P7 mouse testes. Left, Leydig cell clusters; Right, sample source. Arrow shows the predicted developmental direction.

(B) Heatmap of apoptosis-associated genes from different stages of Leydig cells.

(C) Monocle pseudotime trajectory analysis of the Leydig cell clusters defined in (A). Left, Leydig cell clusters; Right, developmental stage information.

(D) Heatmap of differentially expressed genes (DEGs) from different Leydig cell clusters following the trajectory timeline shown in (C). Top, pseudotime direction; Right, the number of DEGs and the representative biological processes and P-values in each group.

(E) Gene network of enriched transcription factors (TFs) identified from gene group 2 in (D).

Fig. S7

YAP

TRA98

merge

P0

P2

P3

P5

P6

P7

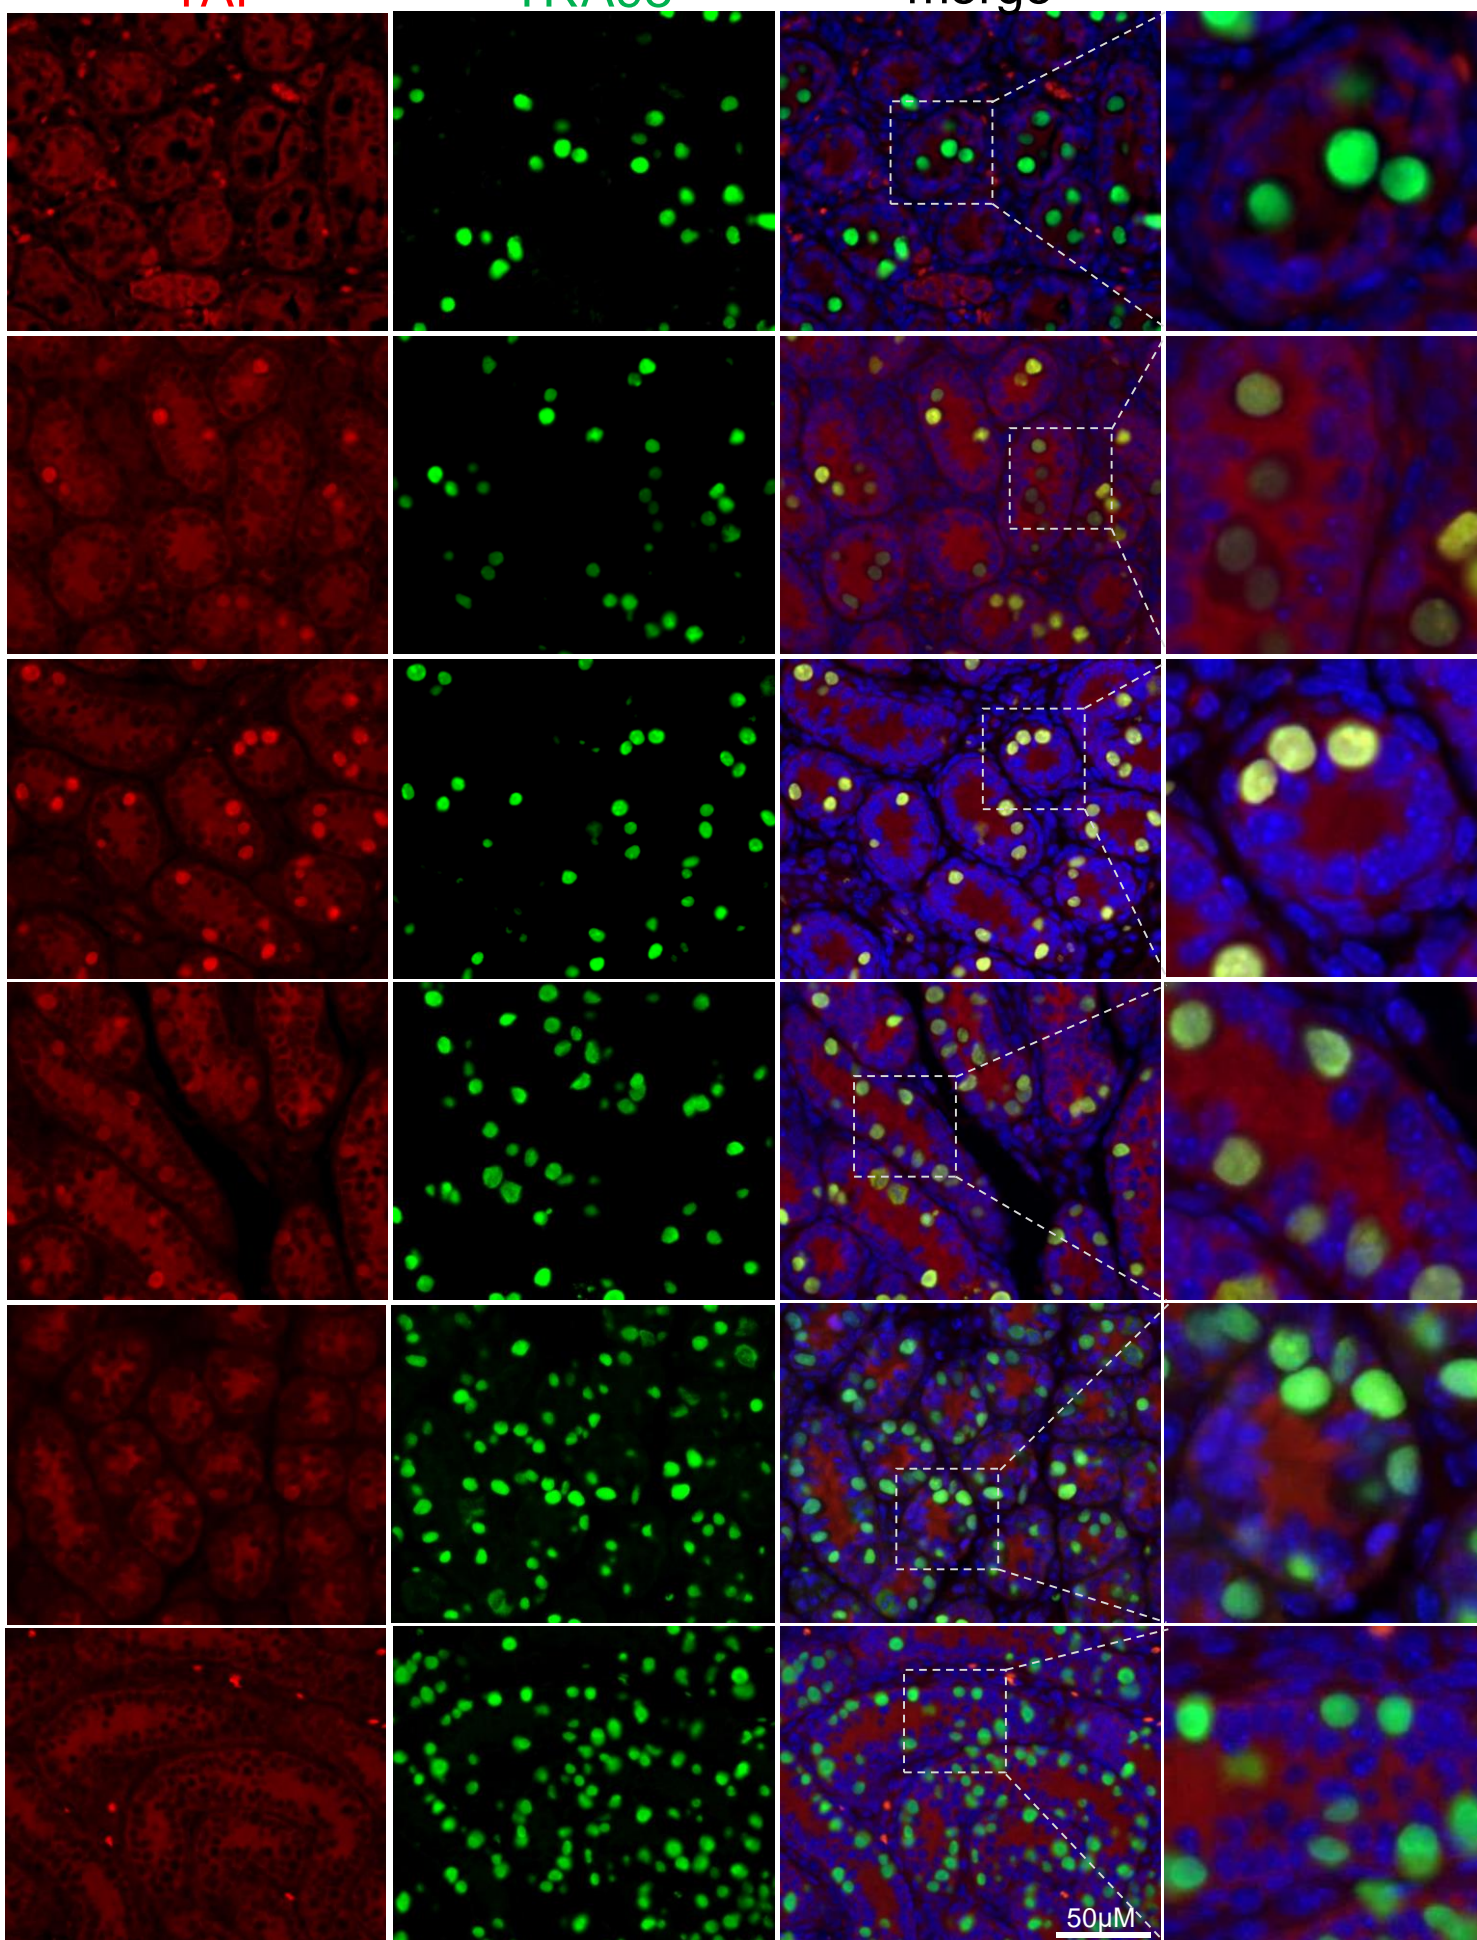

**Figure S7.** Immunofluorescence analysis of P0-P7 testes sections co-stained with antibodies against YAP and TRA98. Scale bar, 50  $\mu\text{m}$ .



Figure S8

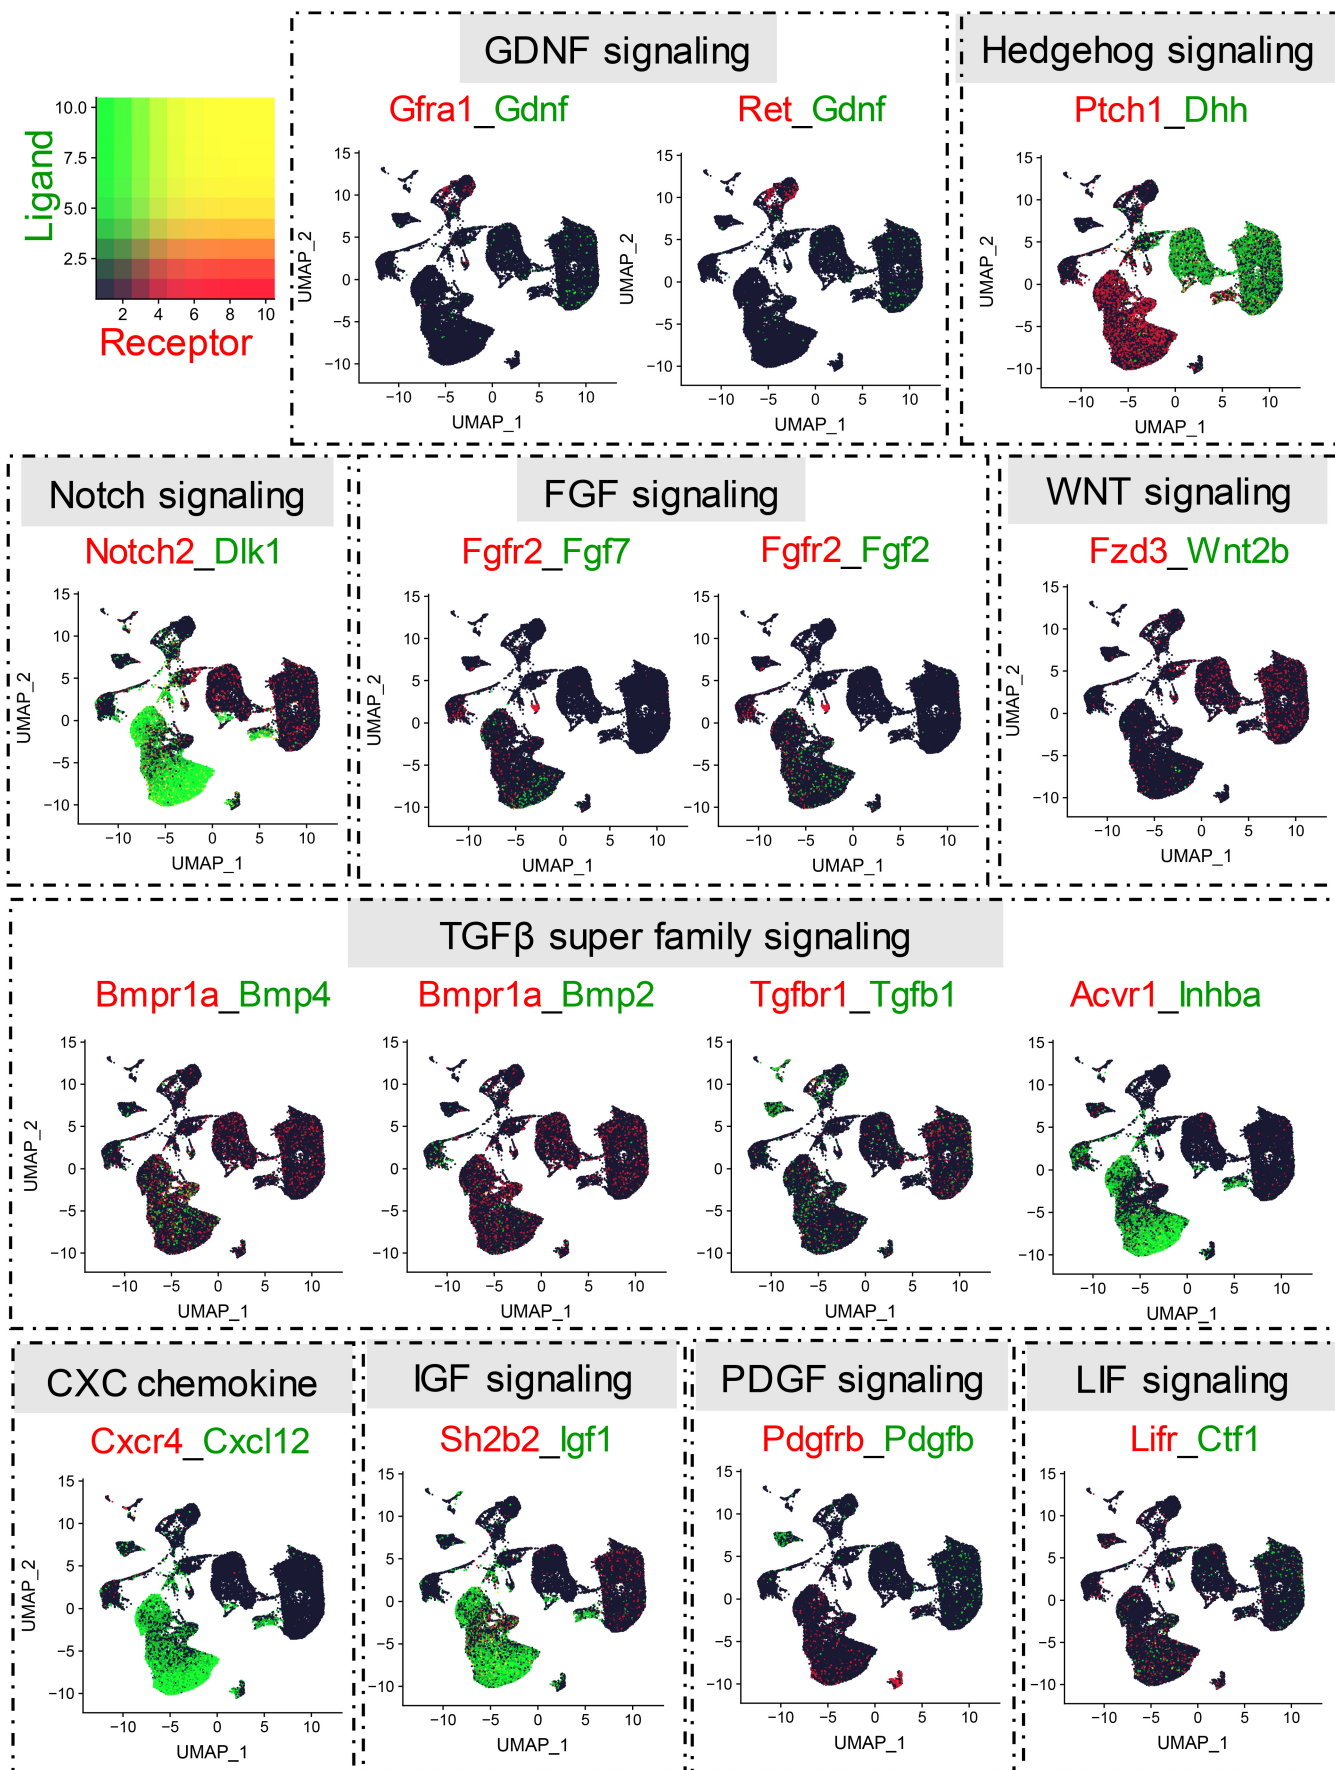

Figure S8. UMAP plots of candidate Receptor-ligand signaling (annotated from Fig. 1A)

**Table S1.**

[Click here to Download Table S1](#)

**Table S2.**

[Click here to Download Table S2](#)

**Table S3.** Mapping results of testes samples analyzed by scRNAseq in this study

| Samples | Total reads | Mean reads / cell | Median gene / cell | # genes detected | # cell captured |
|---------|-------------|-------------------|--------------------|------------------|-----------------|
| E18.5-1 | 216,126,647 | 28,411            | 2,633              | 21,620           | 7,607           |
| E18.5-2 | 269,007,368 | 24,788            | 2,407              | 27,152           | 10,852          |
| P2-1    | 247,447,539 | 26,963            | 2,448              | 21,923           | 9,177           |
| P2-2    | 245,639,102 | 25,037            | 2,650              | 22,465           | 9,811           |
| P7-1    | 205,691,816 | 26,279            | 2,540              | 21,759           | 7,827           |
| P7-2    | 309,204,385 | 35,733            | 3,179              | 21,832           | 8,653           |

**Table S4.** The number of the cells in each cell type from each time point in this study

| Cell types         | Samples |         |      |      |      |      |
|--------------------|---------|---------|------|------|------|------|
|                    | E18.5-1 | E18.5-2 | P2-1 | P2-2 | P7-1 | P7-2 |
| Germ Cells         | 57      | 200     | 384  | 266  | 728  | 1263 |
| Sertoli Cells      | 2286    | 4458    | 4411 | 4771 | 3292 | 4609 |
| Leydig Cells       | 412     | 529     | 295  | 303  | 143  | 228  |
| Peri-Tubular Myoid | 384     | 592     | 381  | 408  | 1153 | 681  |
| Stroma             | 3439    | 3847    | 2906 | 3413 | 1806 | 1293 |
| Endothelial cells  | 210     | 422     | 95   | 136  | 58   | 80   |
| Macrophage         | 135     | 194     | 63   | 98   | 86   | 65   |
| Innate Lymph       | 63      | 83      | 24   | 63   | 21   | 25   |

**Table S5.** Antibodies used in this study

|                                                                                     |                                      |                      |
|-------------------------------------------------------------------------------------|--------------------------------------|----------------------|
| Rabbit polyclonal anti-CDKN2A antibody against cyclin dependent kinase inhibitor 2A | Novus Biologicals                    | Cat # NB200-111SS    |
| Rabbit monoclonal anti-DNMT3L                                                       | Abcam                                | Cat # ab194094       |
| Rat polyclonal anti-KI-67                                                           | Antibodies-Online                    | Cat # ABIN1032382    |
| Polyclonal Sheep IgG against KI-67                                                  | R&D Systems                          | Cat # AF7649-SP      |
| Rabbit polyclonal anti-ELMO1 antibody [C3], C-term                                  | GeneTex                              | Cat # GTX106301      |
| Monoclonal mouse antibody against PALLD                                             | Novus Biologicals                    | Cat # NBP1-25959SS   |
| Rat monoclonal anti-TRA98                                                           | B-Bridge International               | Cat # 73-003         |
| Monoclonal Mouse anti-LHX1                                                          | Developmental Studies Hybridoma Bank | Cat # 4F2            |
| Monoclonal Mouse anti-CD82                                                          | Proteintech                          | Cat # 66803-1-Ig     |
| Polyclonal Rabbit anti-CD82                                                         | LifeSpan Biosciences                 | Cat # LS-C100497-400 |
| Rabbit polyclonal anti-ETV4                                                         | Proteintech                          | Cat # 10684-1-AP     |
| Monoclonal Mouse anti-YAP                                                           | Santa Cruz Biotechnology             | Cat # sc-101199      |
| Goat polyclonal anti-GFP (FITC)                                                     | GeneTex                              | Cat # GTX26662       |
| Goat anti-Rat IgG (H+L) 2 <sup>nd</sup> antibody, 488                               | Thermo Fisher Scientific             | Cat # A-11006        |
| Goat anti-Rat IgG (H+L) 2 <sup>nd</sup> antibody, 555                               | Thermo Fisher Scientific             | Cat # A-21434        |
| Goat anti-Rabbit IgG (H+L) 2 <sup>nd</sup> antibody, 555                            | Thermo Fisher Scientific             | Cat # A27039         |
| Goat anti-Rabbit IgG (H+L) 2 <sup>nd</sup> antibody, 488                            | Thermo Fisher Scientific             | Cat # A-11008        |
| Goat anti-Mouse IgG (H+L) 2 <sup>nd</sup> antibody, 555                             | Thermo Fisher Scientific             | Cat # A28180         |
